# Supplementary material for: Plant-microbe Synergy: Employing Coastal Plant Bacteria for Wheat Prosperity under Combined Saline and Heat Stress
Source: Research Square preprint supplement (doi:10.21203/rs.3.rs-7130122/v1), 2025-08-13
Supplement: Supplementary file 1 [file 3acfde248d94029a89440034.docx]

**Plant-microbe Synergy: Employing Coastal Plant Bacteria for Wheat Prosperity under Combined Saline and Heat Stress**

**Ivana Staiano**a**, Stefany Castaldi**a**, Ermenegilda Vitale**a**, Carmen Arena**a**, Rachele Isticato**a, b,c*

aDepartment of Biology, University of Naples Federico II, Complesso Universitario Monte S. Angelo, Naples, Italy

bNational Biodiversity Future Center (NBFC), Palermo 90133, Italy

cInteruniversity Center for Studies on Bioinspired Agro-Environmental Technology (BAT Center), Portici, NA, Italy

*Corresponding author at: Department of Biology, University of Naples Federico II, Complesso Universitario Monte S. Angelo, Naples, Italy. E-mail address: isticato@unina.it (R. Isticato).

**Table S1**

Preliminary characterization of bacterial isolates

| **Strain** | **Plant association** | **Salinity NaCl (mM)** | **Temperature range (°C)** | **Colony colour** | **Colony morphology** | **Spore formation** | **Swarming capacity** | **Biofilm formation** |
| --- | --- | --- | --- | --- | --- | --- | --- | --- |
| **ERA1** | Endophytic | 50-600 | 25-42 | Creamy-white | Circular | - | - | + |
| **ERA2** | Endophytic | 50-600 | 25-37 | Creamy-white | Flat | - | - | - |
| **ERA3** | Endophytic | 50-600 | 25-42 | Milky-white | Wrinkled | + | - | + |
| **ERA4** | Endophytic | 50-600 | 25-42 | Yellowish | Translucent | - | - | + |
| **ERA5** | Endophytic | 50-330 | 25-37 | Creamy-white | Circular | - | - | - |
| **ERA6** | Endophytic | 50-600 | 25-37 | Pinky-red | Circular | - | - | + |
| **ERA7** | Endophytic | 50-600 | 25-37 | Creamy-white | Circular | - | - | - |
| **ERA9** | Endophytic | 50-600 | 25-42 | Milky-white | Circular | - | - | + |
| **ESOA** | Exophytic | 50-330 | 25-42 | Creamy-white | Circular | - | + | + |
| **ESOB1** | Exophytic | 50-330 | 25-42 | Creamy-white | Circular | - | - | + |
| **ESOB2** | Exophytic | 50-330 | 25-42 | Milky-white | Irregular | + | + | - |
| **ERAS1** | Endophytic | 50-600 | 25-42 | Milky-white | Wrinkled | + | - | - |
| **ERAS2** | Endophytic | 50-330 | 25-37 | Creamy-white | Circular | - | - | - |
| **ERAS3** | Endophytic | 50-600 | 25-42 | Creamy-white | Circular | + | - | - |
| **ERAS4** | Endophytic | 50-600 | 25-37 | Orange | Wrinkled | + | - | - |

**Table S2**

Taxonomical identification of the isolated strains throughout 16S rRNA blast analysis.

| **Strain ID** | **Accession**  **number** | **Nearest neighbour from**  **NCBI with Accession number** | **Similarity (%)** |
| --- | --- | --- | --- |
| ERA1 | PV239528 | *Enterobacter hormaechei subsp. xiangfangensis* (NR 126208.1) | 99.67 |
| ERA2 | PV239529 | *Pseudomonas juntendi* (NR 180457.1) | 99.77 |
| ERA3 | PV239530 | *Bacillus paramycoides* (NR 157734.1) | 98.71 |
| ERA4 | PV239531 | *Kosakonia cowanii* (NR 025566.1) | 98.53 |
| ERA5 | PV239532 | *Pseudomonas taiwanensis* (NR 116172.1) | 99.70 |
| ERA6 | PV239533 | *Serratia marcescens* (NR 114043.1) | 99.40 |
| ERA7 | PV239534 | *Pseudomonas plecoglossicida* (NR 114226.1) | 99.55 |
| ERA9 | PV239535 | *Enterobacter cloacae*subsp. *dissolvens* (NR 118011.1) | 98.50 |
| ESOA | PV239540 | *Enterobacter cloacae* subsp. *dissolvens* (NR 044978.1) | 98.97 |
| ESOB1 | PV239541 | *Enterobacter cloacae* (NR 113615.1) | 99.03 |
| ESOB2 | PV239542 | *Bacillus proteolyticus* (NR 157735.1) | 99.70 |
| ERAS1 | PV239536 | *Bacillus cabrialesii* (NR 180419.1) | 99.20 |
| ERAS2 | PV239537 | *Bacillus safensis* (NR 113945.1) | 99.34 |
| ERAS3 | PV239538 | *Bacillus stercoris* (NR 181952.1) | 99.42 |
| ERAS4 | PV239539 | *Rossellomorea aquimaris* (NR 025241.1) | 99.04 |

**Fig. S1** Phylogenetic analysis based on 16S rRNA gene sequences of bacterial isolates. The evolutionary history was inferred using the Neighbor-Joining method. The optimal tree with the sum of branch length = 9,418 is shown. The percentage of replicate trees in which the associated taxa clustered together in the bootstrap test (1.000 replicates) are shown next to the branches. The evolutionary distances were computed using the Kimura 2-parameter method and are in the units of the number of base substitutions per site. The rate variation among sites was modelled with a gamma distribution (shape parameter = 1,00). The analytical procedure encompassed 48 coding nucleotide sequences using 1st, 2nd, 3rd, and non-coding positions. The pairwise deletion option was applied to all ambiguous positions for each sequence pair resulting in a final data set comprising 1.600 positions. Evolutionary analyses were conducted in MEGA12 utilizing up to 7 parallel computing threads. The 16S rRNA sequence of *Aquifex aeolicus* (AJ309733.1) was used to assign an outgroup species

**
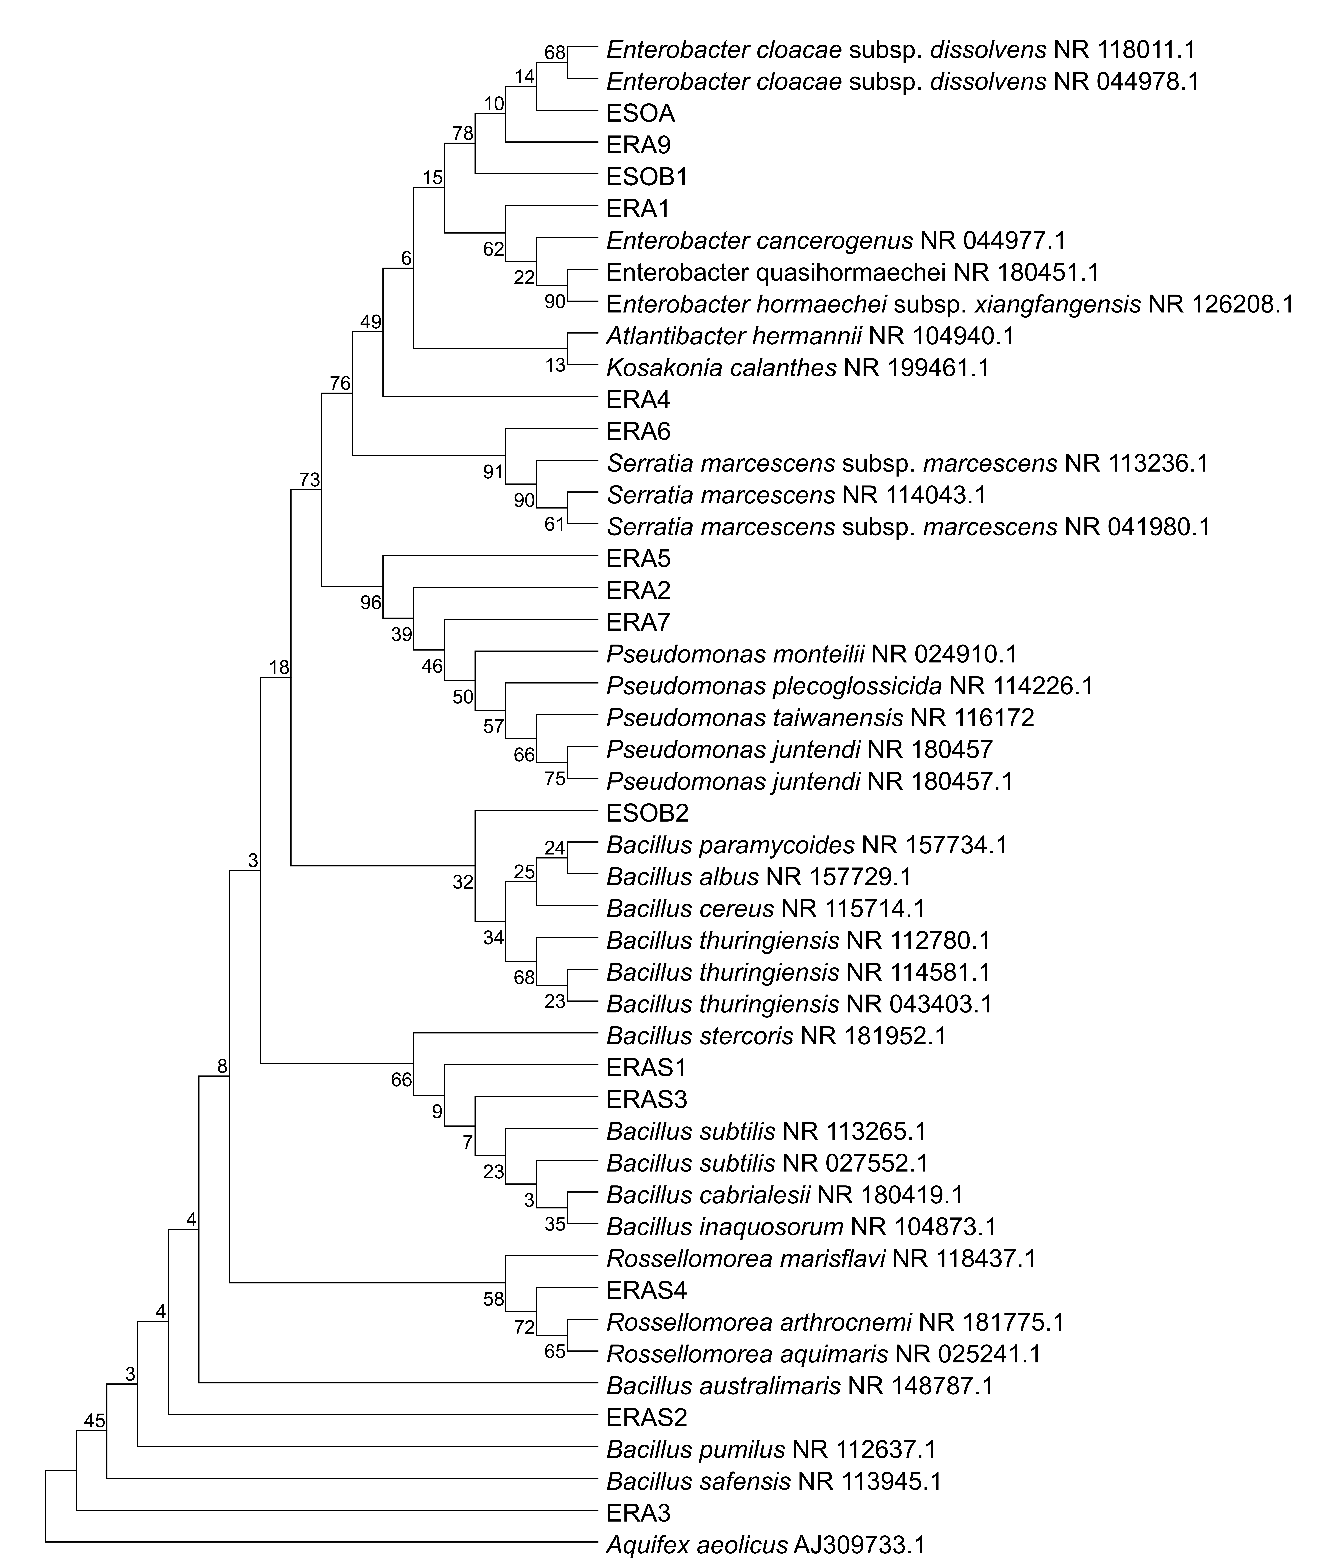
**

**Table S3** Phosphate solubilization of the top-performing strains evaluated by growing the bacteria on Pikovskaya medium. Results are reported as no activity (-), halo diameter < 5 mm (+), halo diameter ≥ 5 mm (++), experiment was conducted in triplicate. Strain ERAS2 is not able to grow at 42 °C, as reported above in Table S1

| **Strain ID** | **Temperature (°C)** | **PVK** | | |
| --- | --- | --- | --- | --- |
|  |  | 50 mM | 132mM | 330mM |
| ERA1 | 25 | ++ | + | + |
| 37 | ++ | + | + |
| 42 | + | - | + |
| ERA9 | 25 | + | ++ | ++ |
| 37 | ++ | ++ | ++ |
| 42 | + | + | ++ |
| ESOA | 25 | + | + | + |
| 37 | + | + | ++ |
| 42 | - | + | + |
| ESOB1 | 25 | ++ | ++ | ++ |
| 37 | ++ | ++ | ++ |
| 42 | ++ | + | + |
| ERAS2 | 25 | ++ | + | + |
| 37 | + | + | - |
| ~~42~~ |  |  |  |

**Table S4** In vitro growth of wheat seedlings in presence of single PGPR

|  | **25 °C – 0mM NaCl** | | | | **37 °C – 132mM NaCl** | | | |
| --- | --- | --- | --- | --- | --- | --- | --- | --- |
| **Inoculation** | | **Root length (cm)** | **Shoot length (cm)** | **Total length (cm)** | | **Root length (cm)** | **Shoot length (cm)** | **Total length (cm)** | |
| CTRL | | 4.79 ± 0.83 | 3.69 ± 0.50 | 8.47 ± 1.23 | | 0.02 ± 0.01 | 0.01 ± 0.01 | 0.01 ± 0.01 | |
| ERA1 | | 10.64 ± 1.95 | 4.77 ± 1.18 | 13.02 ± 1.89 | | 0.23 ± 0.13 | 0.75 ± 0.25 | 0.55 ± 0.26 | |
| ERA6 | | 7.53 ± 1.02 | 4.96 ± 0.81 | 11.23 ± 1.39 | | 0.63 ± 0.15 | 0.56 ± 0.14 | 1.22 ± 0.26 | |
| ERA9 | | 12.06 ± 2.01 | 7.93 ± 1.19 | 19.99 ± 3.14 | | 0.63 ± 0.12 | 1.05 ± 0.25 | 1.48 ± 0.37 | |
| ESOA | | 8.14 ± 1.41 | 6.84 ± 1.21 | 14.97 ± 2.59 | | 0.43 ± 0.10 | 0.65 ± 0.15 | 0.75 ± 0.26 | |
| ESOB2 | | 8.66 ± 1.76 | 5.98 ± 1.46 | 13.93 ± 2.75 | | 0.90 ± 0.16 | 0.60 ± 0.04 | 1.50 ± 0.20 | |

**Table S5** In vitro growth of wheat seedlings in presence of PGPR consortia

|  | **25 °C – 0mM NaCl** | | | **37 °C – 132mM NaCl** | | |
| --- | --- | --- | --- | --- | --- | --- |
| **Inoculation** | **Root length (cm)** | **Shoot length (cm)** | **Total length (cm)** | **Root length (cm)** | **Shoot length (cm)** | **Total length (cm)** |
| CTRL | 1.63 ± 0.44 | 1.28 ± 0.39 | 2.91 ± 0.71 | 0.43 ± 0.07 | 0.00 ± 0.00 | 0.43 ± 0.00 |
| CONSI | 1.94 ± 0.45 | 1.88 ± 0.31 | 3.81 ± 0.69 | 0.69 ± 0.06 | 0.00 ± 0.00 | 0.69 ± 0.06 |
| CONSII | 3.20 ± 0.58 | 2.41 ± 0.34 | 5.61 ± 0.89 | 0.71 ± 0.06 | 1.25 ± 0.20 | 1.27 ± 0.26 |
| CONSIII | 4.12 ± 0.50 | 3.23 ± 0.29 | 7.35 ± 0.69 | 0.60 ± 0.11 | 1.68 ± 0.46 | 2.21 ± 0.50 |

**Table S6**

Schematic representation of the set-up of the pot experiments on wheat plants without bacteria (CTRL) and in presence of the selected PGPR combined in a consortium (CONSIII).

| 25 °C | | | | |  | 37 °C | | | | |
| --- | --- | --- | --- | --- | --- | --- | --- | --- | --- | --- |
| 0 mM NaCl | |  | 132 mM NaCl | |  | 0 mM NaCl | |  | 132 mM NaCl | |
| CTRL | CONSIII |  | CTRL | CONSIII |  | CTRL | CONSIII |  | CTRL | CONSIII |
